# Supplementary material
Source: PubMed Central journal article supplement (PMC4587331)

## Figure Legends (Supplementary Figures)

**Figure S1(a).** Box plots of the normalized  $\log_{10}$  of the reporter ion intensities of each TMT isobaric mass tags in the two experimental replicates. For each box plot, the median value is represented by the central, horizontal line. **(b)** Scatter plot showing the number of peptides and spectra match per protein in experimental replicate-02. **(c)** Number of quantified proteins and the corresponding number of MS/MS spectra used to compute expression ratios ( $\text{NPC1I}^{1061\text{T}}/\text{NPC1}^{\text{WT}}$ ). For example, 860 proteins were quantified by a single spectrum in experimental replicate-01 and 800 proteins in replicate-02, respectively. **(d)** Median absolute deviation (MAD) of the quantified proteins from replicate-01 and 02.

**Figure S2.** DEPs observed in only one of the experimental replicates.

**Figure S3. (a)** Twenty proteins in the DEP dataset are annotated as lysosome-localized by the GO database. Among them, 15 proteins are also categorized as lysosomal by the hLGDB database. **(b)** Venn diagram showing the unique and overlaps in a subset of proteins from the DEP dataset that are assigned to 3 sub-endosomal compartments: the early endosome, the late endosome, and the recycling endosome.

Supplementary Figure S1 (a)

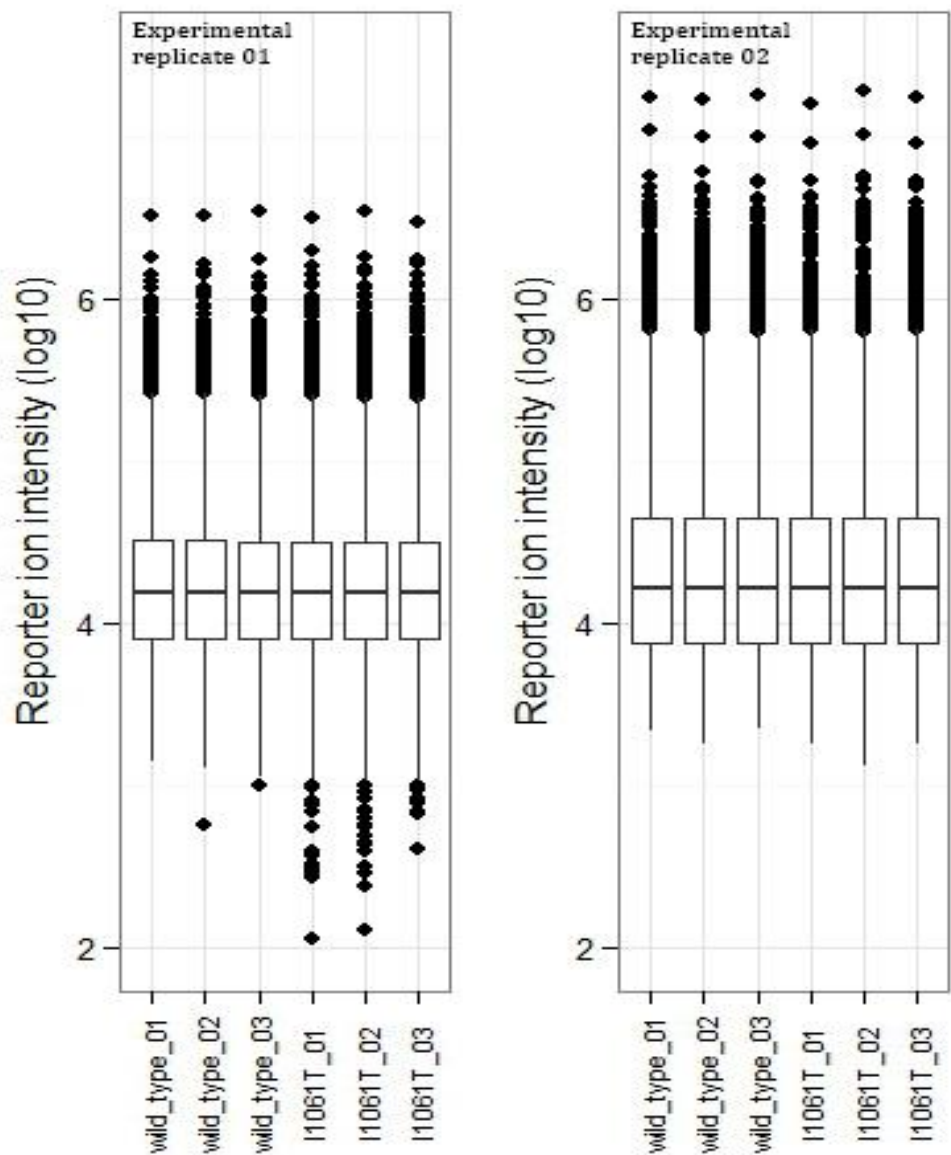

# Supplementary Figure

S1 (b)

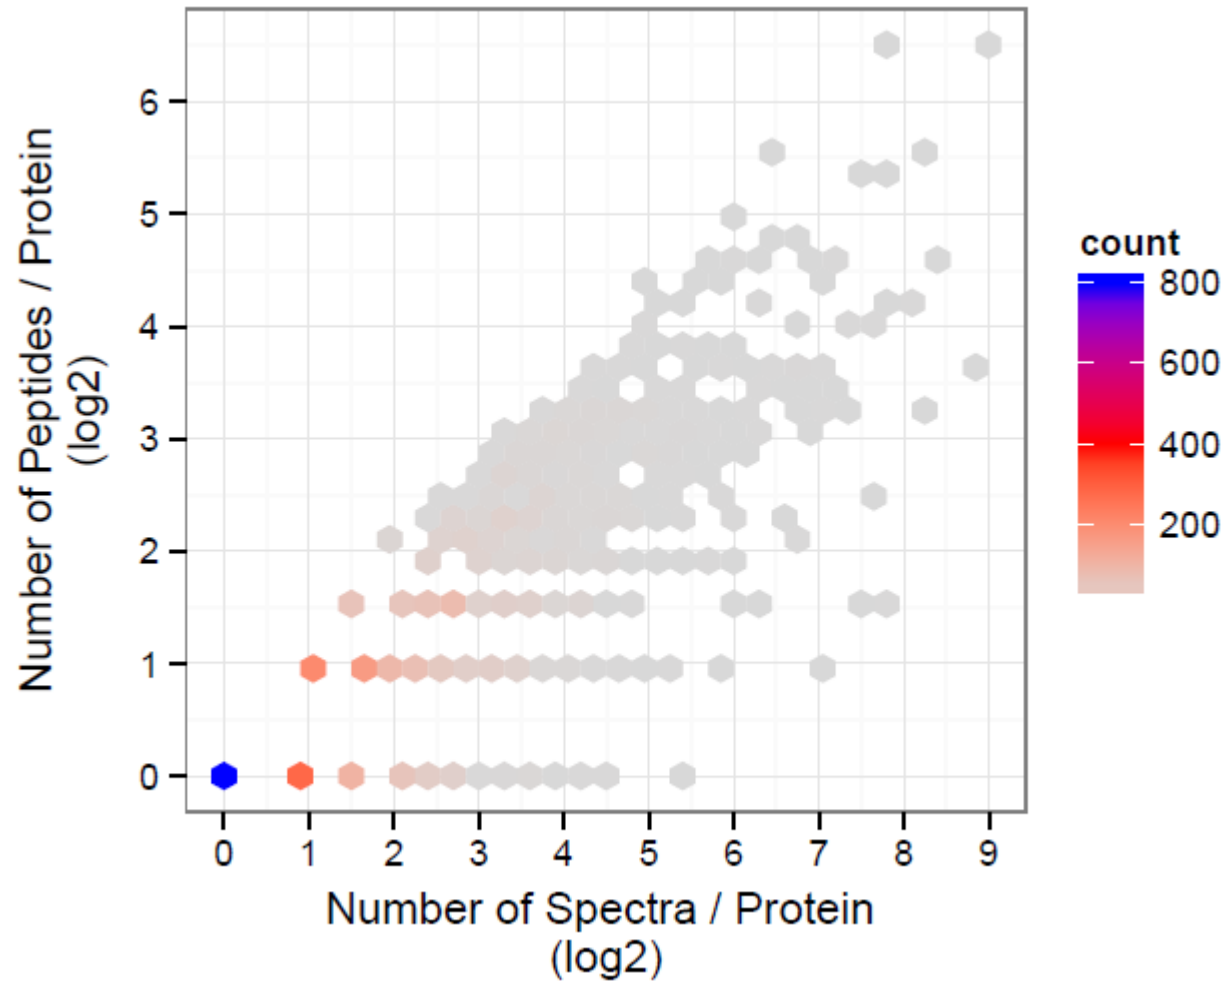

## Supplementary Figure S1 (c)

| No. of MS/MS spectra/ protein | No. of quantified Proteins (Percentage) |                           |
|-------------------------------|-----------------------------------------|---------------------------|
|                               | Experimental replicate 01               | Experimental replicate 02 |
| 1                             | 860 (29.5)                              | 800 (27.4)                |
| 2                             | 488 (16.8)                              | 485 (16.6)                |
| 3                             | 334 (11.5)                              | 323 (11.0)                |
| 4                             | 232 (8.0)                               | 207 (7.1)                 |
| 5                             | 159 (5.5)                               | 191 (6.5)                 |
| 6 - 10                        | 446 (15.3)                              | 444 (15.2)                |
| 11 - 50                       | 339 (11.6)                              | 385 (13.2)                |
| > 50                          | 54 (1.9)                                | 89 (3.0)                  |

## Supplementary Figure S1 (d)

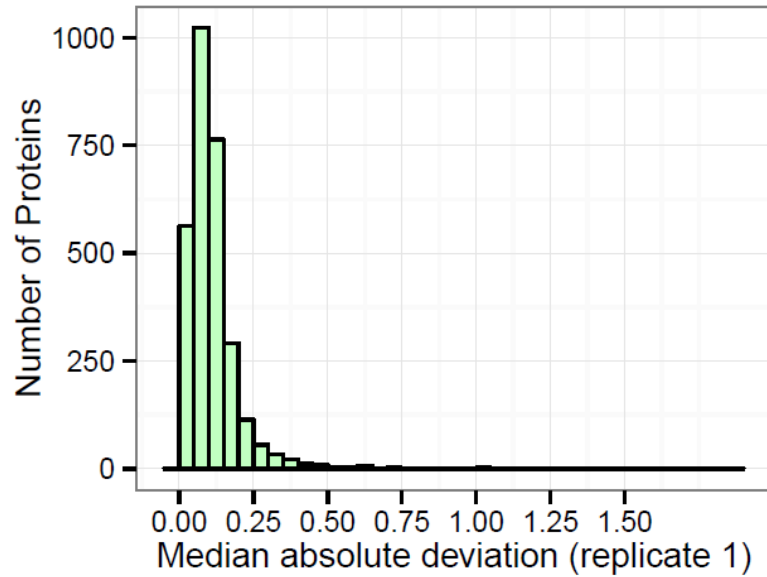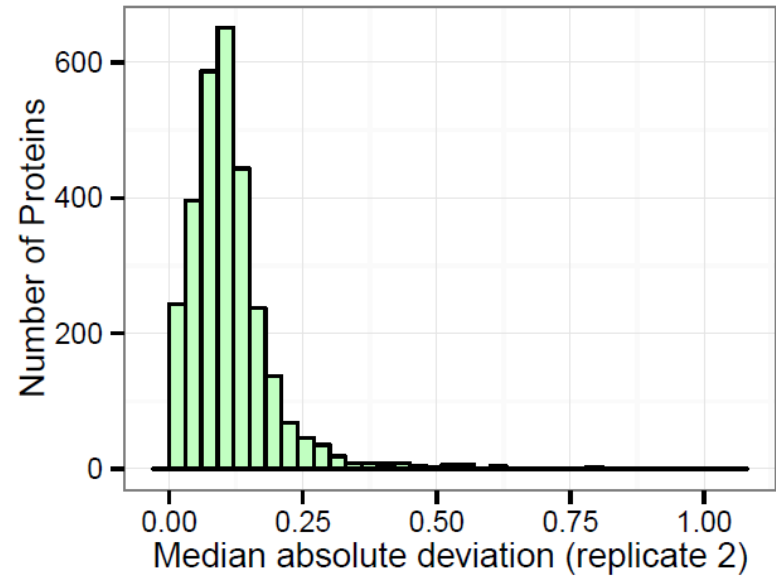

# Supplementary Figure S2

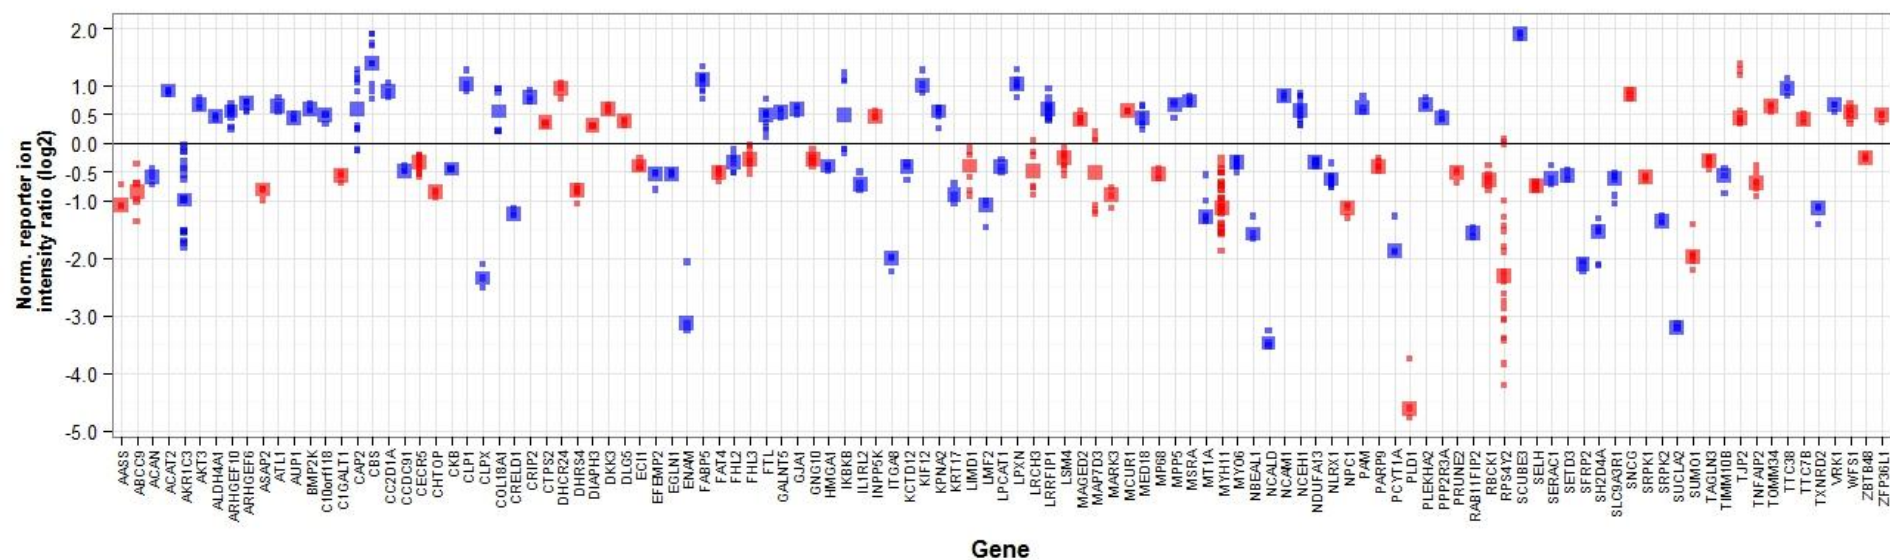

## Supplementary Figure S3

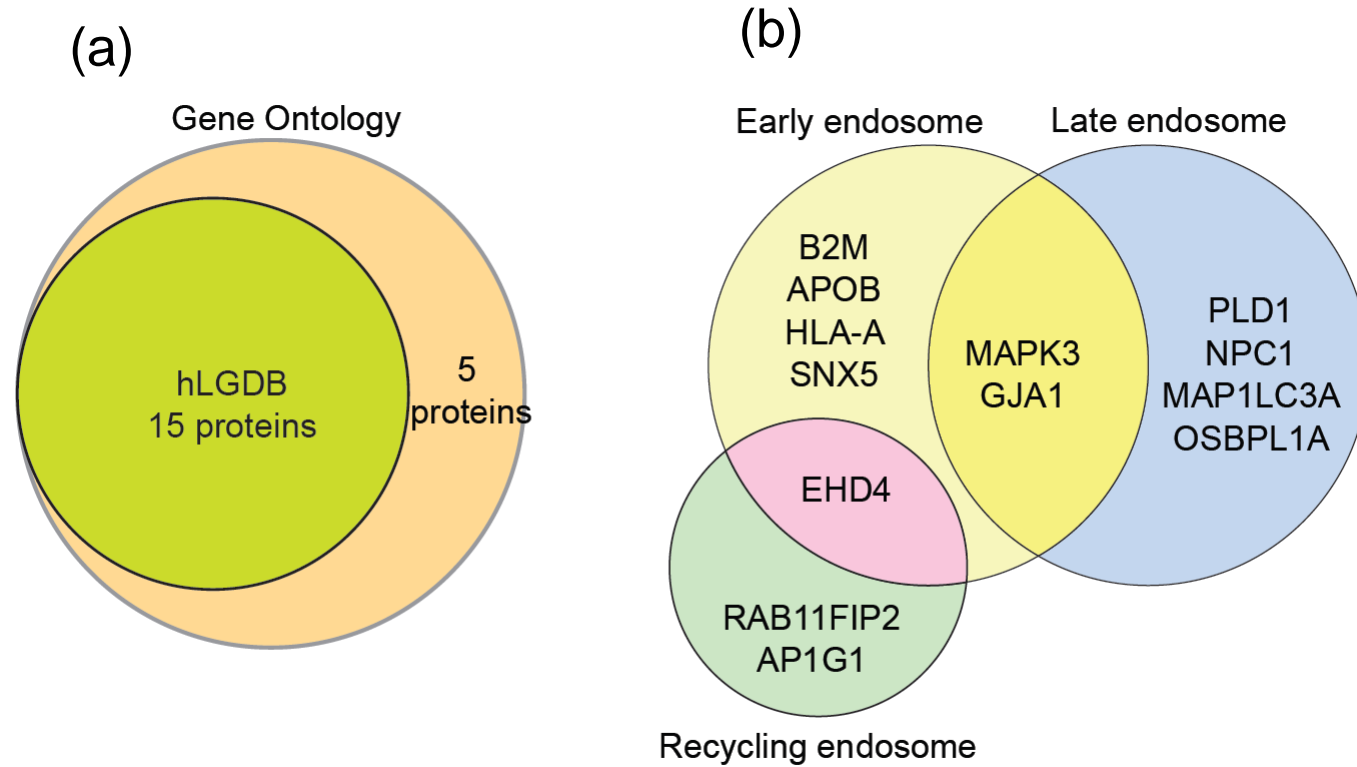

Supplement: supp_M114.045609_mcp.M114.045609-1.pdf [file supp_M114.045609_mcp.M114.045609-1.pdf]
